# Supplementary material for: Bestrophin-4 relays HES4 and interacts with TWIST1 to suppress epithelial-to-mesenchymal transition in colorectal cancer cells
Source: eLife journal article supplement (doi:10.7554/elife.88879), 2023-11-01

Figure 4-supplemental figure 1B

|            | Input |   | IP  |    |     |    |
|------------|-------|---|-----|----|-----|----|
|            |       |   | IgG | HA | IgG | HA |
| Myc-TWIST1 | -     | + | -   | -  | +   | +  |
| BEST4-HA   | -     | + | -   | -  | +   | +  |

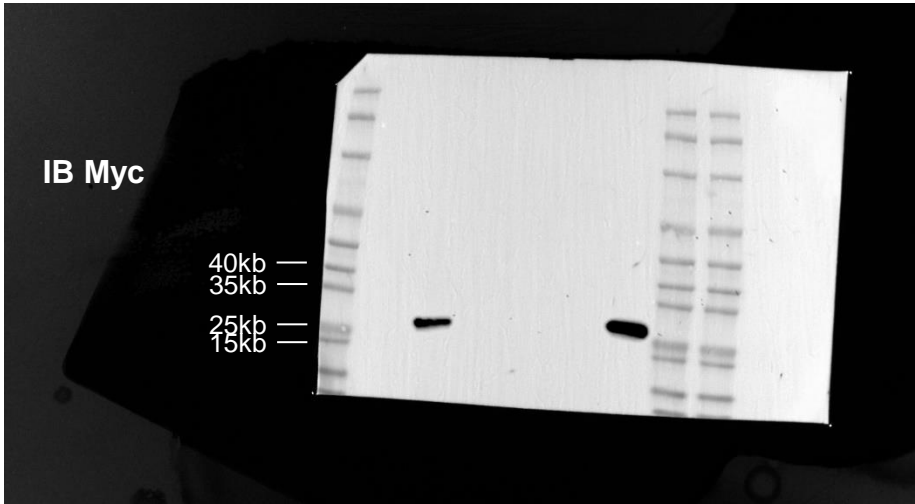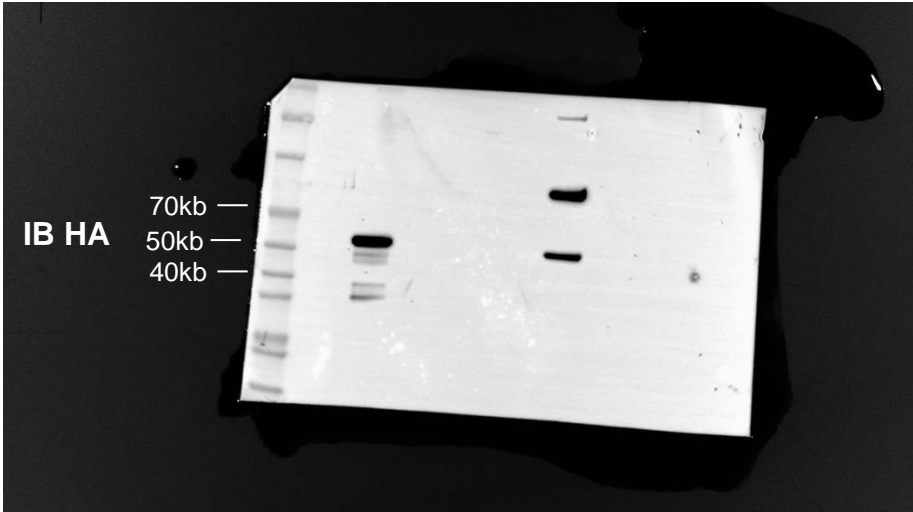

|            | Input |   | IP  |    |     |    |
|------------|-------|---|-----|----|-----|----|
|            |       |   | IgG | HA | IgG | HA |
| Myc-TWIST1 | -     | + | -   | -  | +   | +  |
| BEST4-HA   | -     | + | -   | -  | +   | +  |

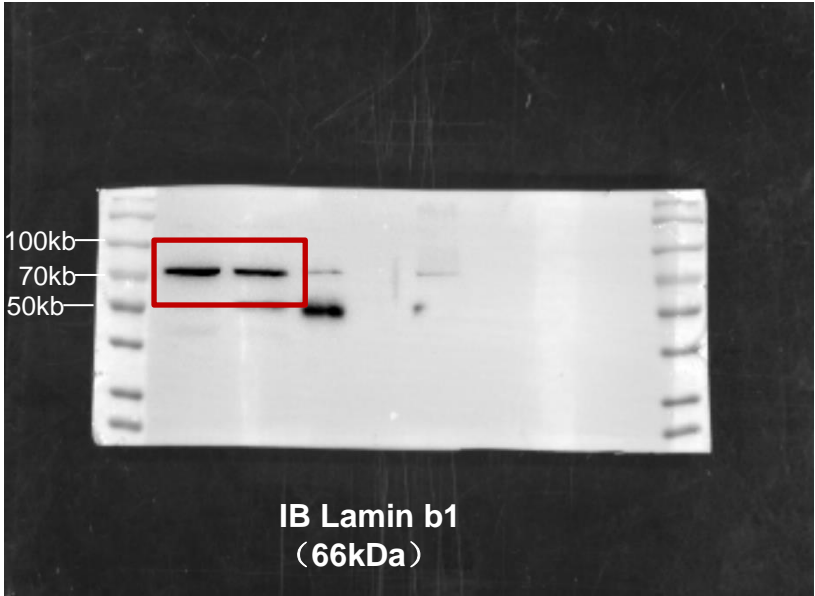

Supplement: fig4-figsupp1-data2 [file elife-88879-fig4-figsupp1-data2-v1.zip]
