# Supplementary figures and images for: Bestrophin-4 relays HES4 and interacts with TWIST1 to suppress epithelial-to-mesenchymal transition in colorectal cancer cells
Source: eLife journal article supplement (doi:10.7554/elife.88879), 2023-11-01

Figure 1-supplemental figure 1A

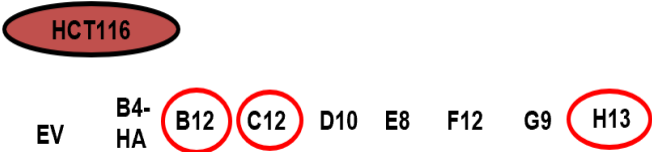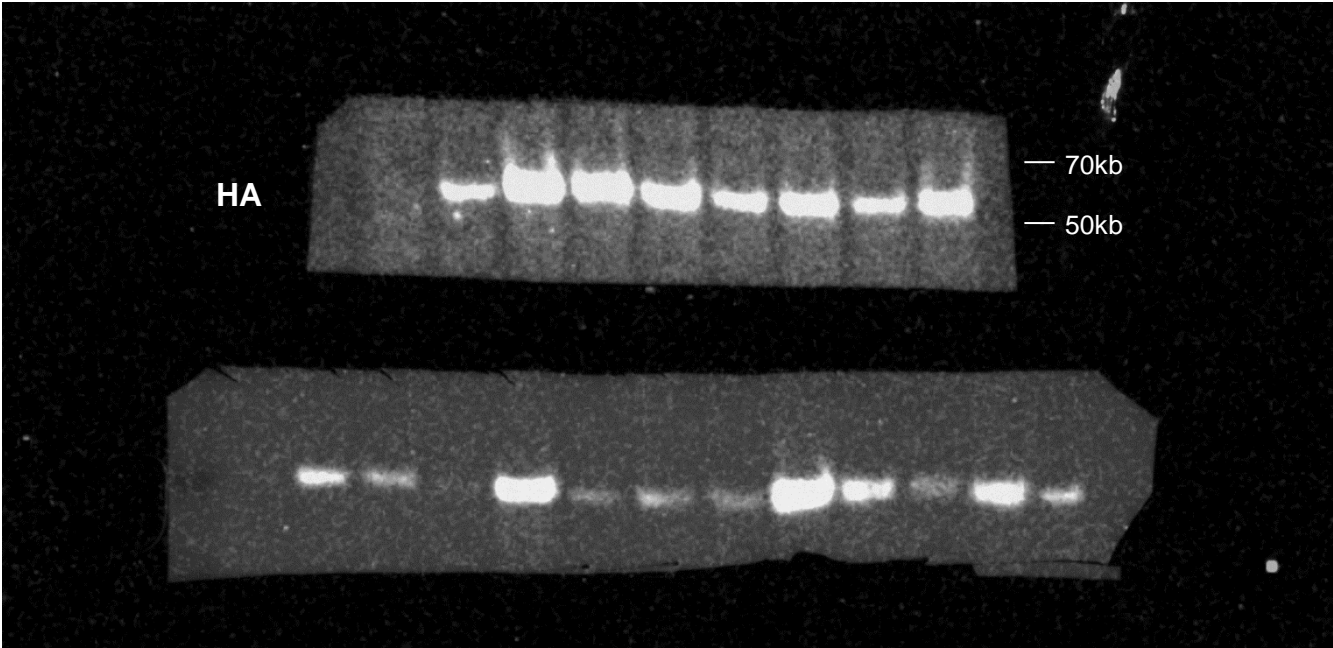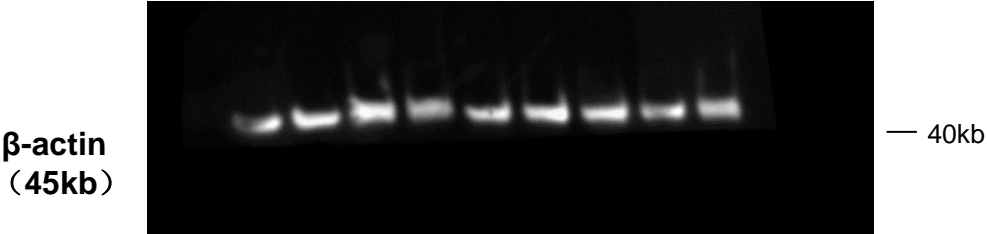

Supplement: fig1-figsupp1-data2 [file elife-88879-fig1-figsupp1-data2-v1.zip]

Figure 1-supplemental figure 1G

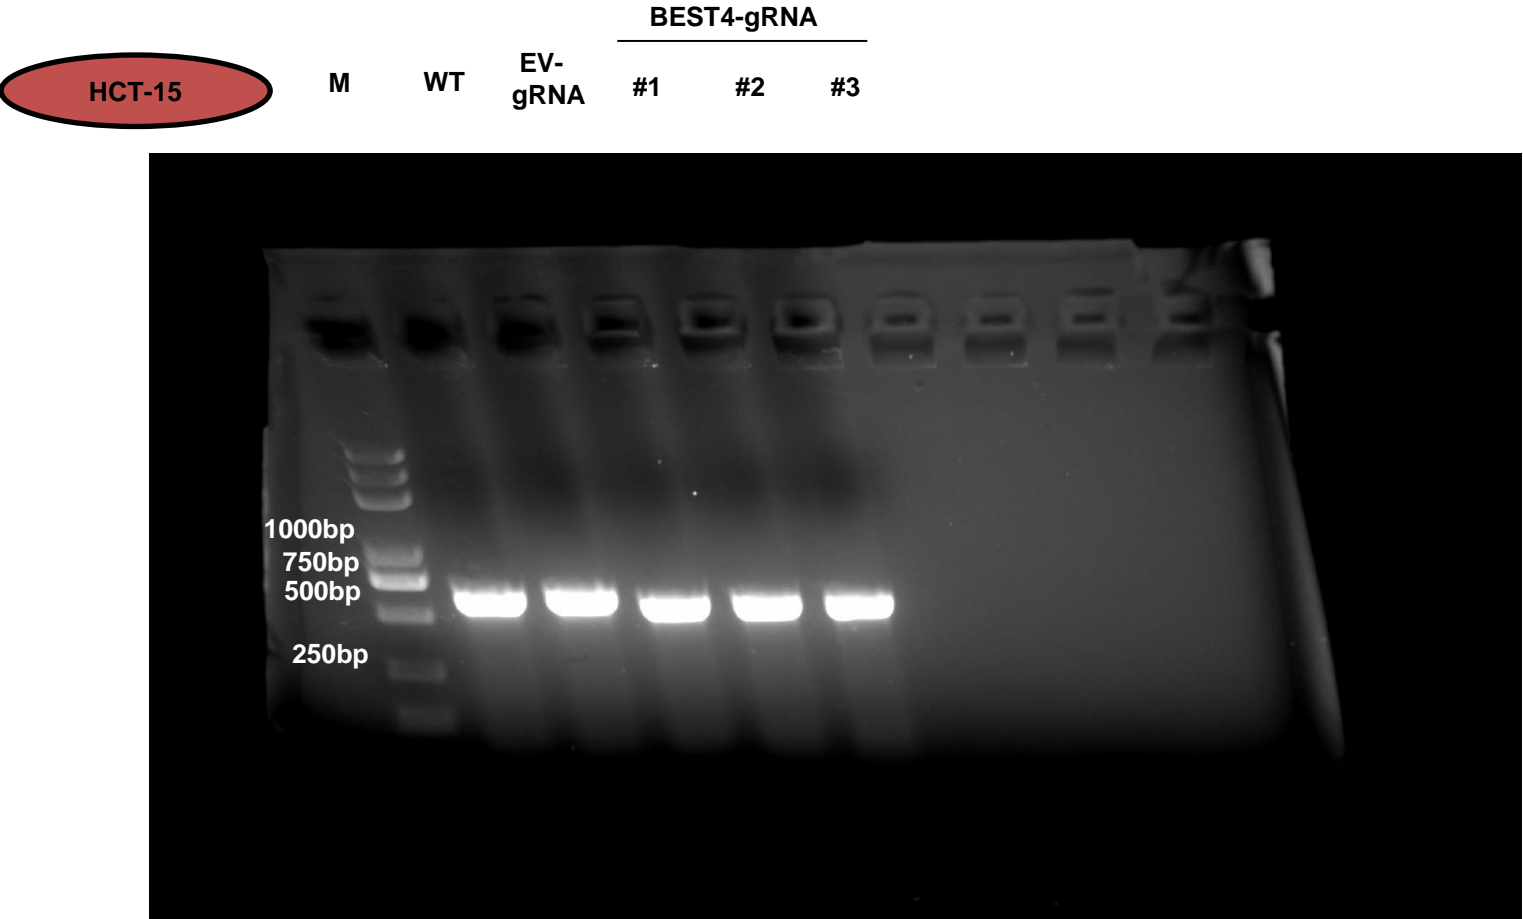

Supplement: fig1-figsupp1-data2 [file elife-88879-fig1-figsupp1-data2-v1.zip]

Figure 1-supplemental figure 1B

HCT116

EV    B4-HA    B12    C12    D10    E8    F12    G9    H13

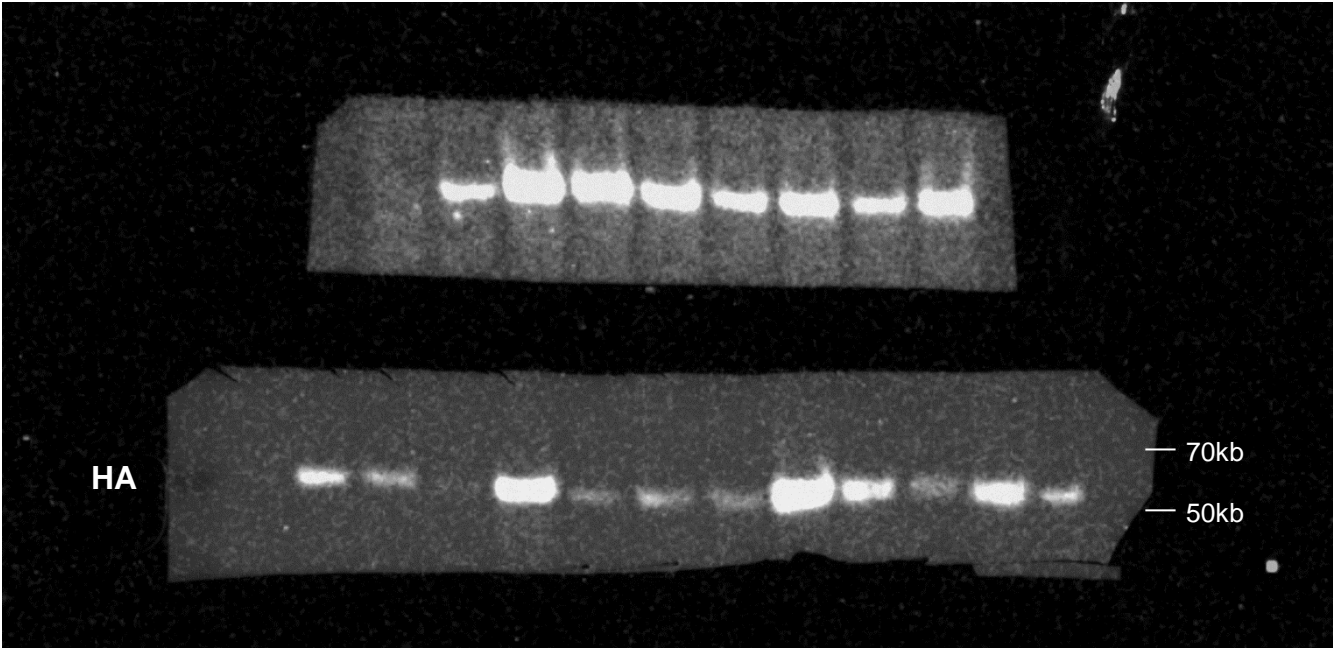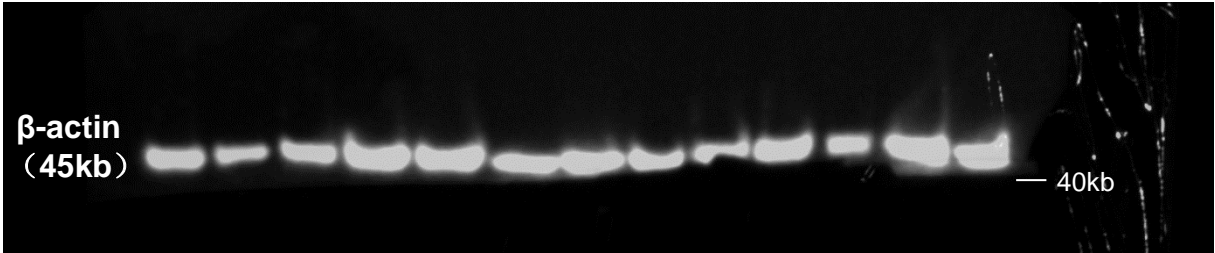

Supplement: fig1-figsupp1-data2 [file elife-88879-fig1-figsupp1-data2-v1.zip]

Figure 1-supplemental figure 1C

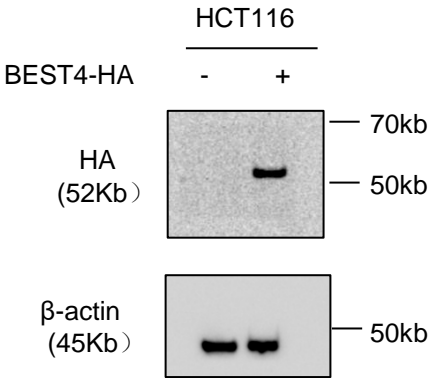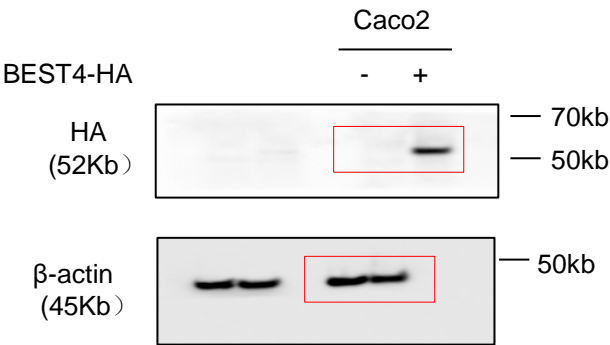

Supplement: fig1-figsupp1-data2 [file elife-88879-fig1-figsupp1-data2-v1.zip]

Figure 1-supplemental figure 1H

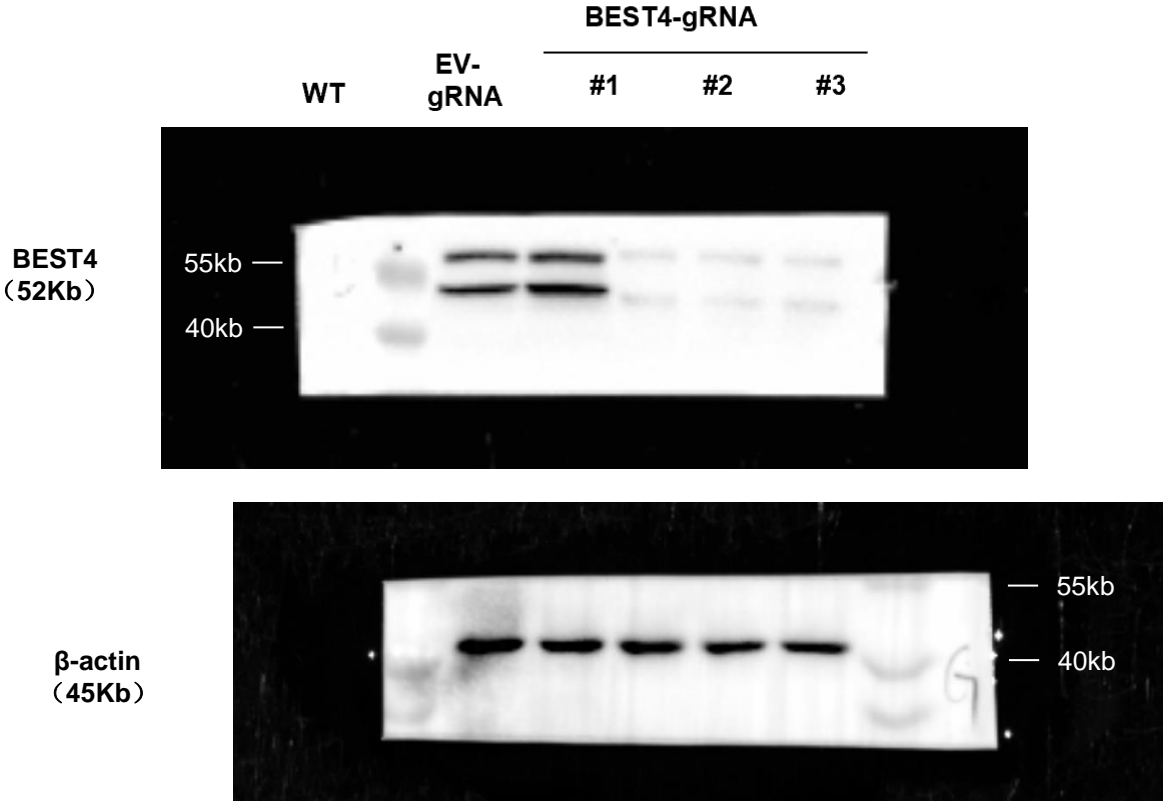

Supplement: fig1-figsupp1-data2 [file elife-88879-fig1-figsupp1-data2-v1.zip]

**Fig 2C**

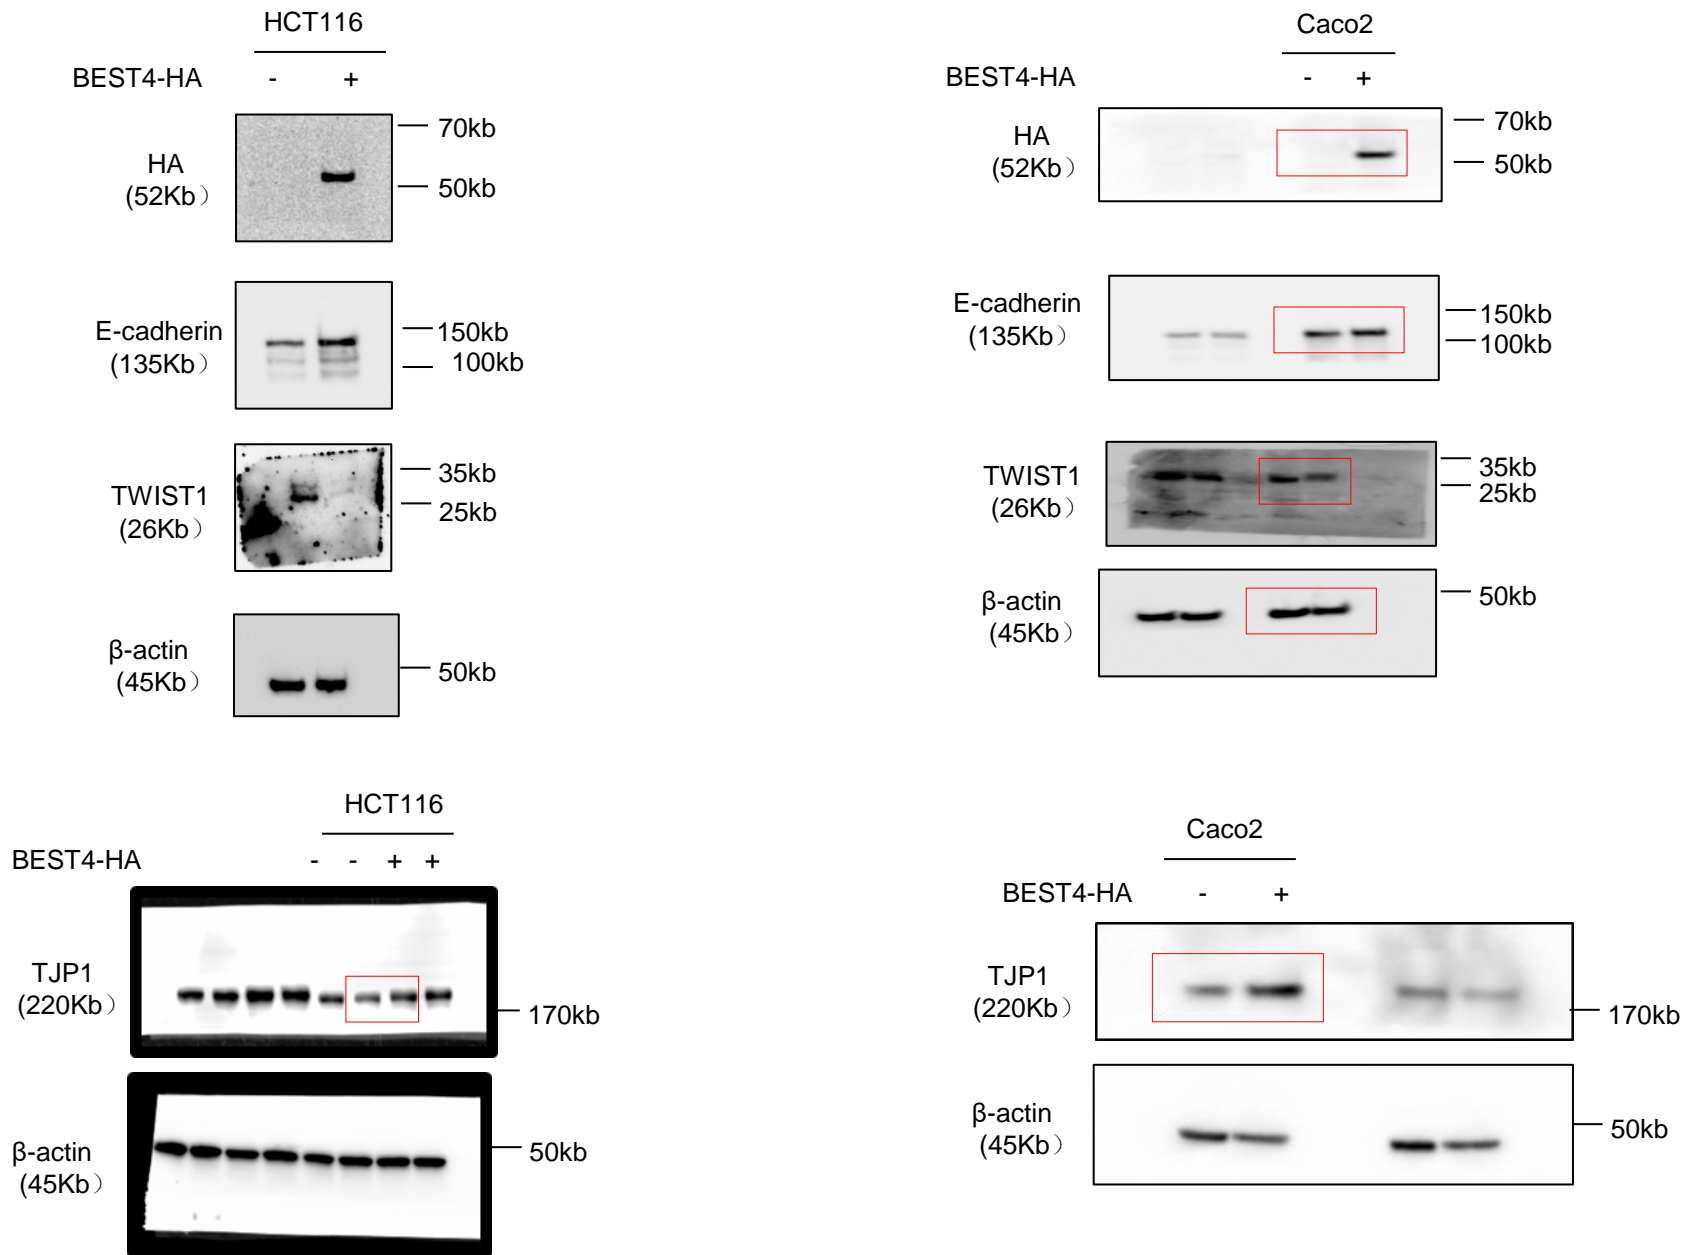

Supplement: fig2-data2 [file elife-88879-fig2-data2-v1.zip]

**Fig 2D**

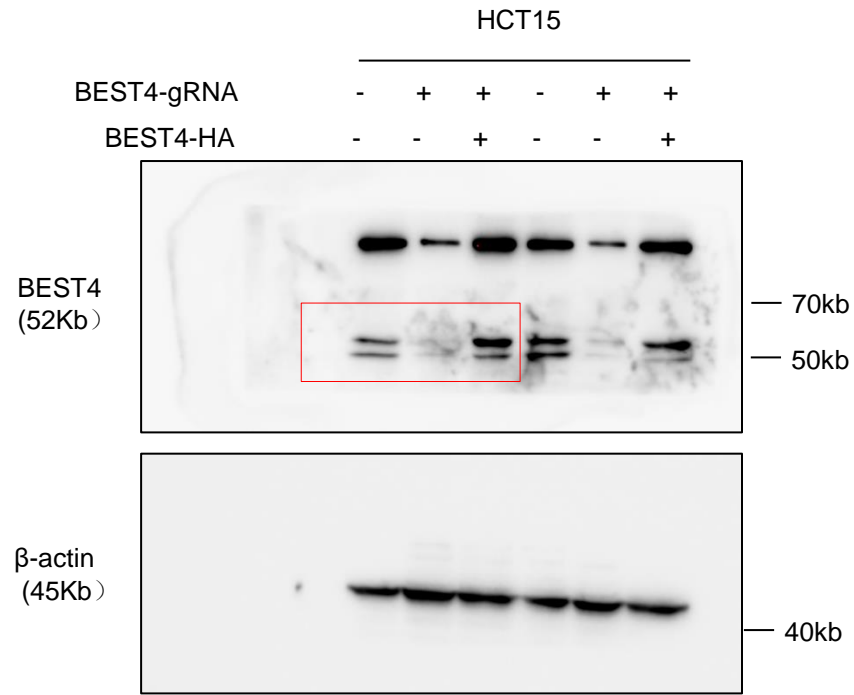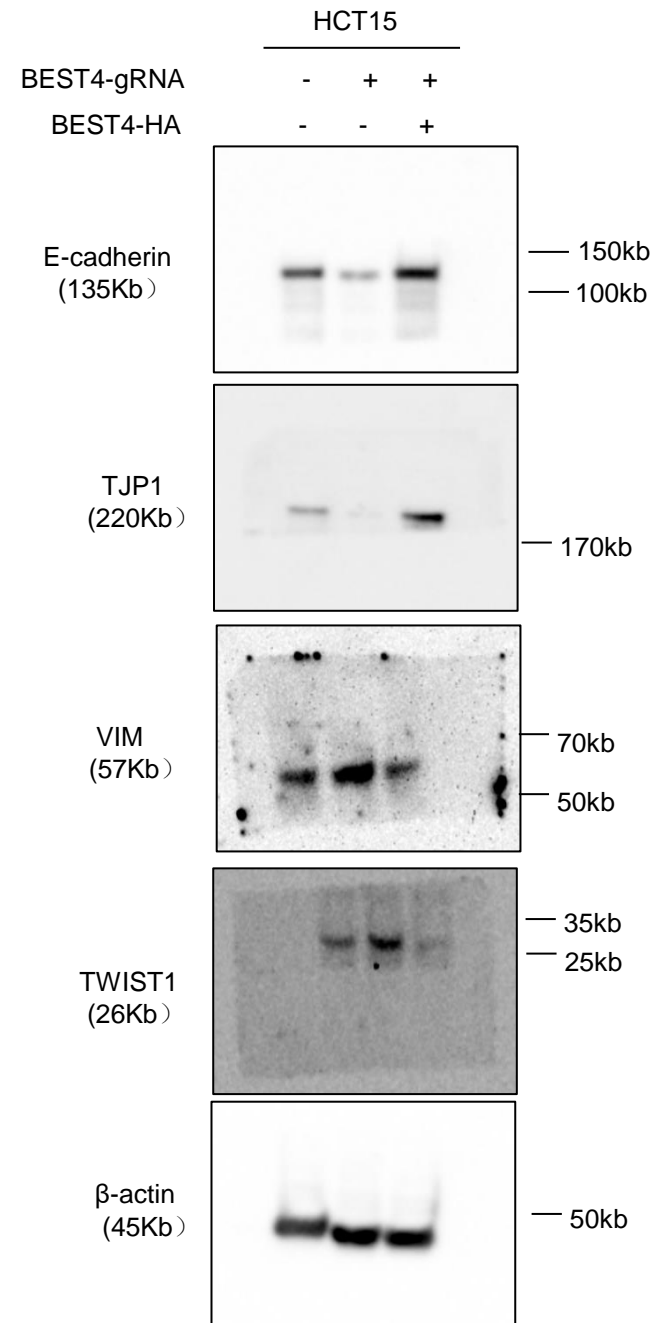

Supplement: fig2-data2 [file elife-88879-fig2-data2-v1.zip]

Fig 2I

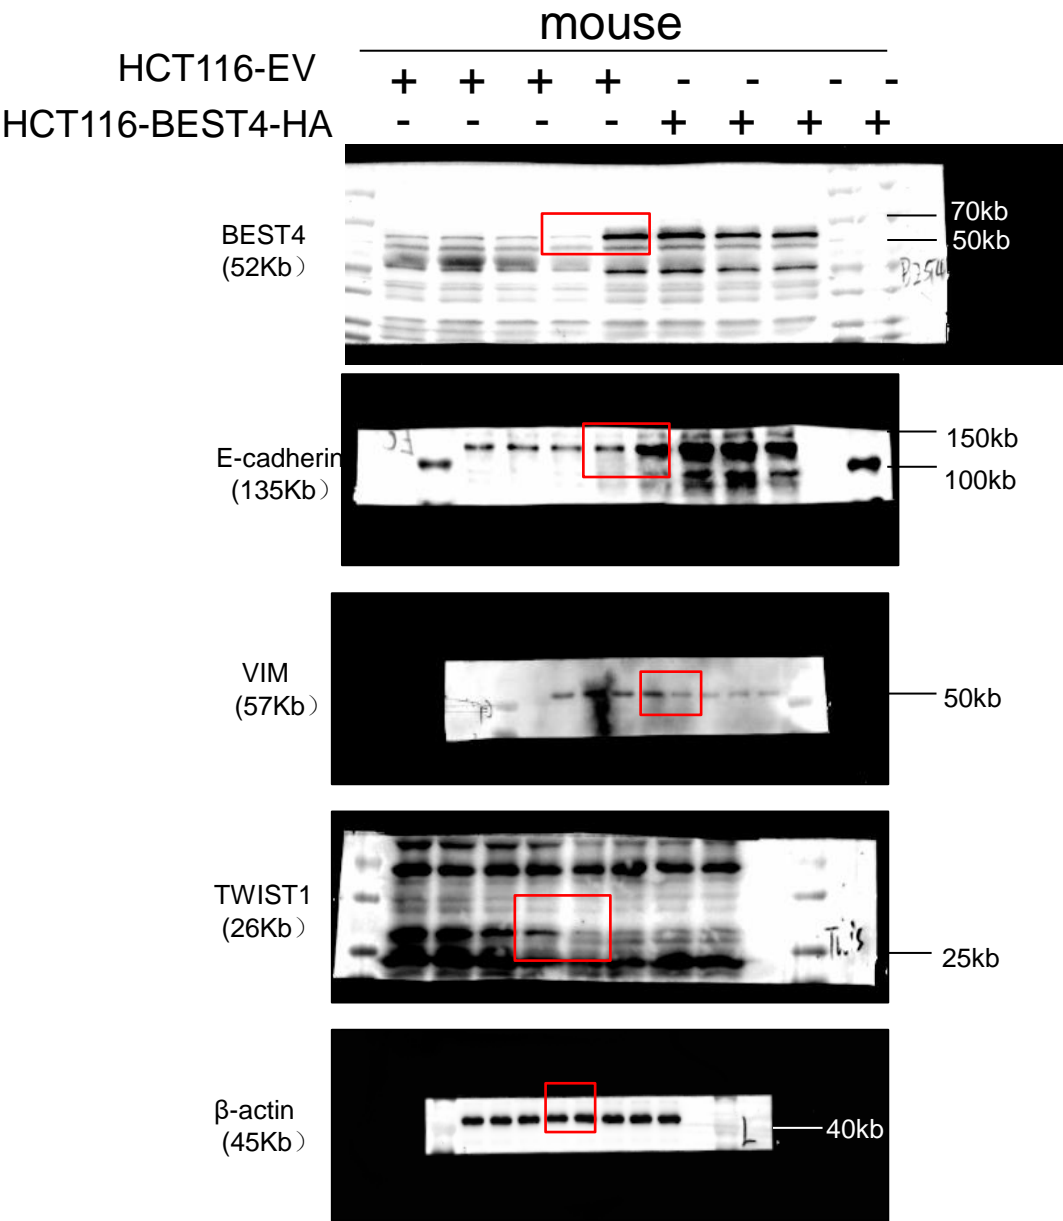

Supplement: fig2-data2 [file elife-88879-fig2-data2-v1.zip]

Fig 3F

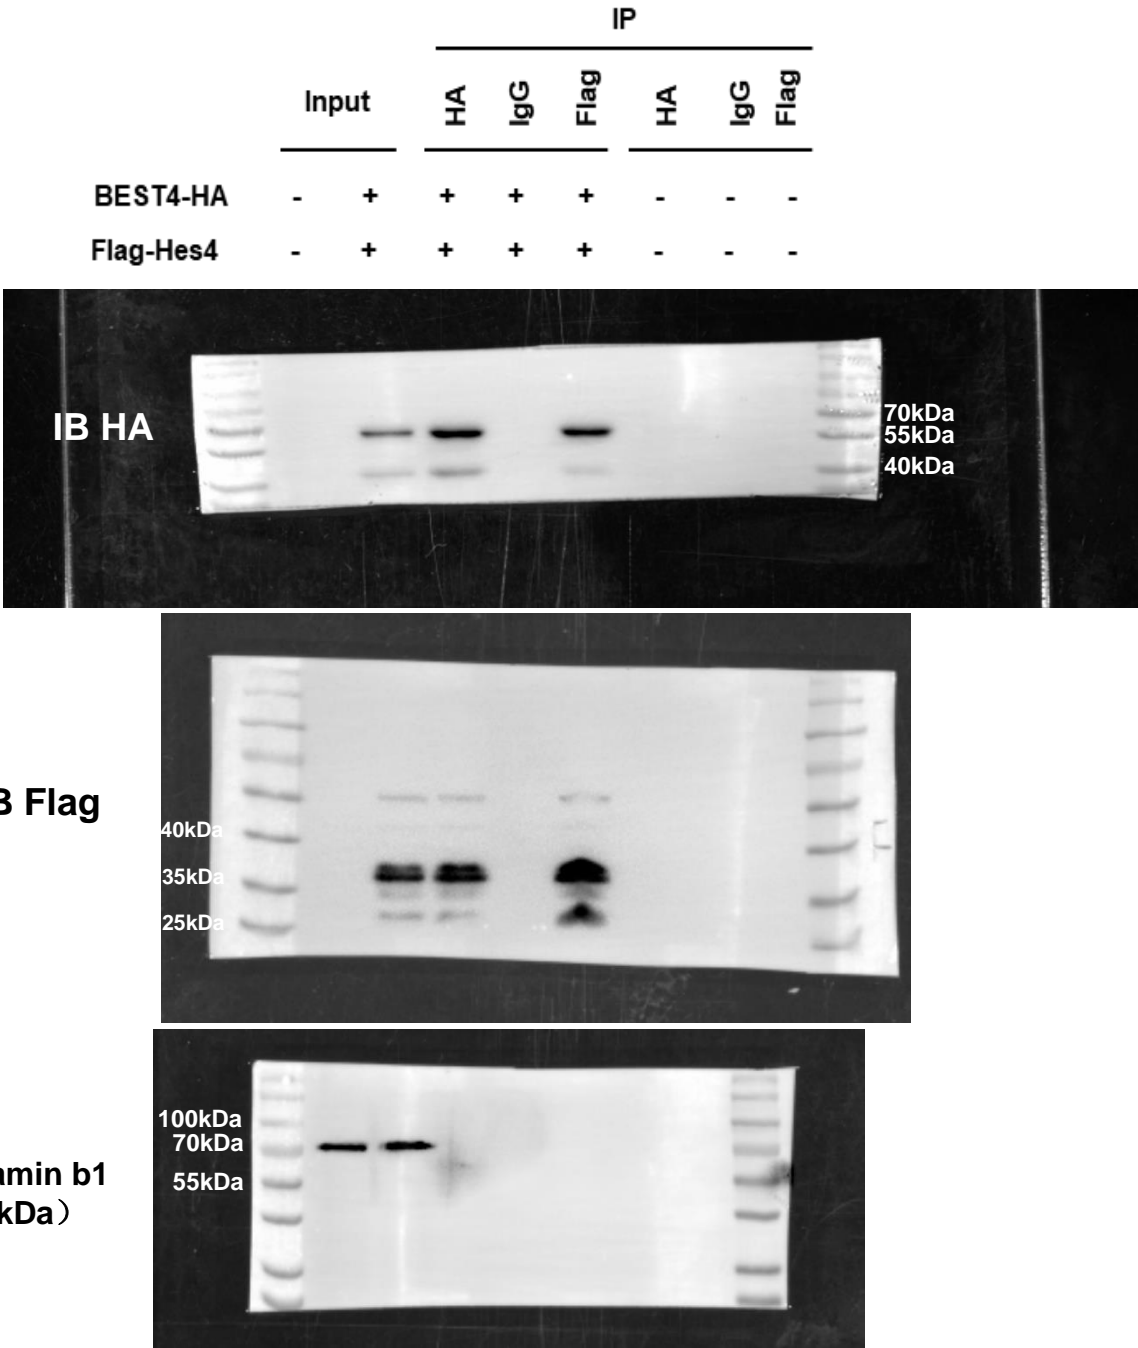

Supplement: fig3-data2 [file elife-88879-fig3-data2-v1.zip]

Fig 3B

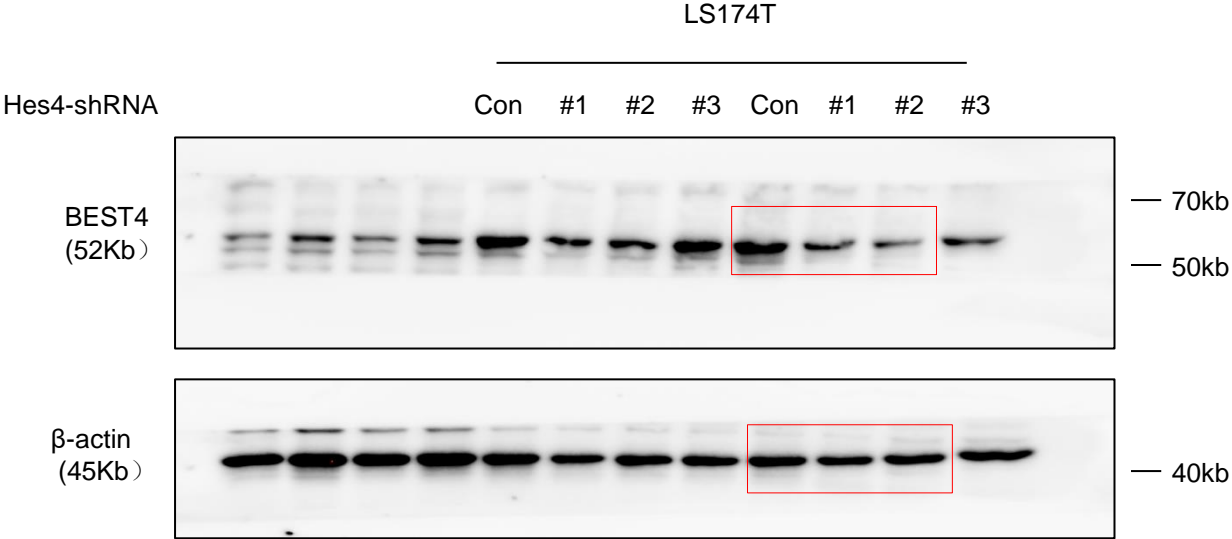

Supplement: fig3-data2 [file elife-88879-fig3-data2-v1.zip]

Fig 3A

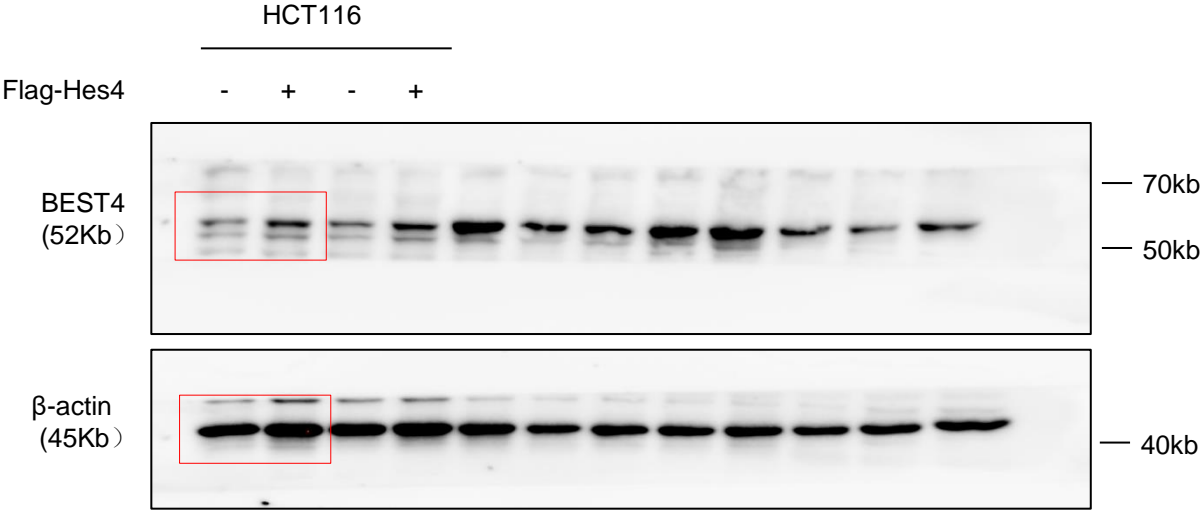

Supplement: fig3-data2 [file elife-88879-fig3-data2-v1.zip]

Figure 3-supplemental figure 1E

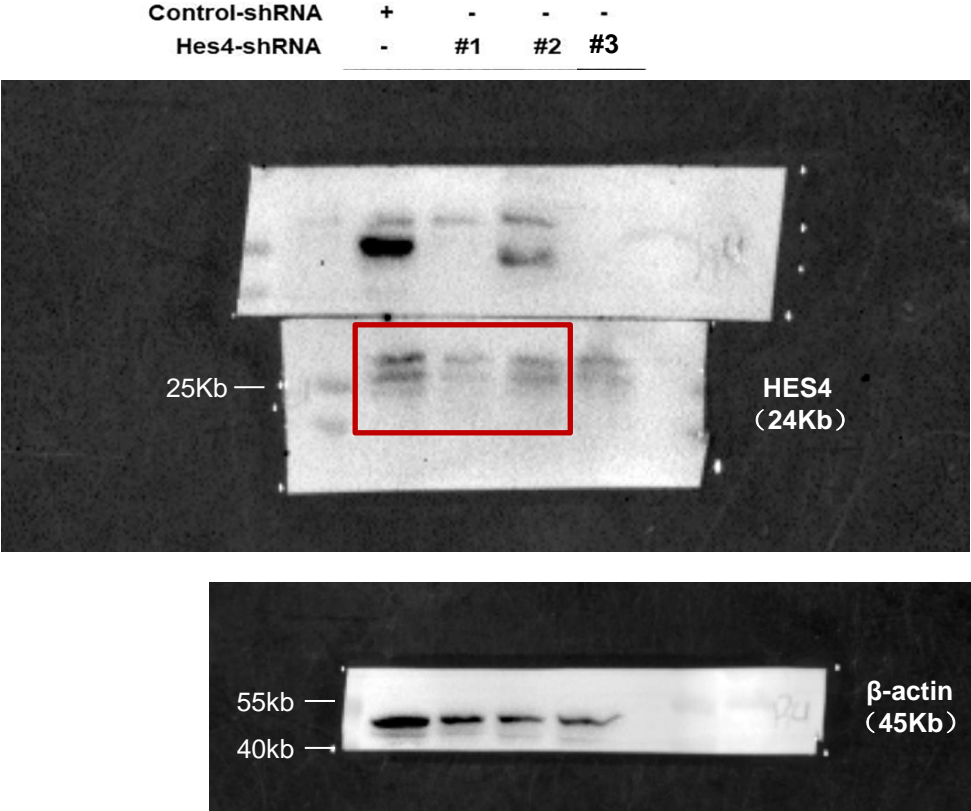

Supplement: fig3-figsupp1-data2 [file elife-88879-fig3-figsupp1-data2-v1.zip]

Figure 3-supplemental figure 1C

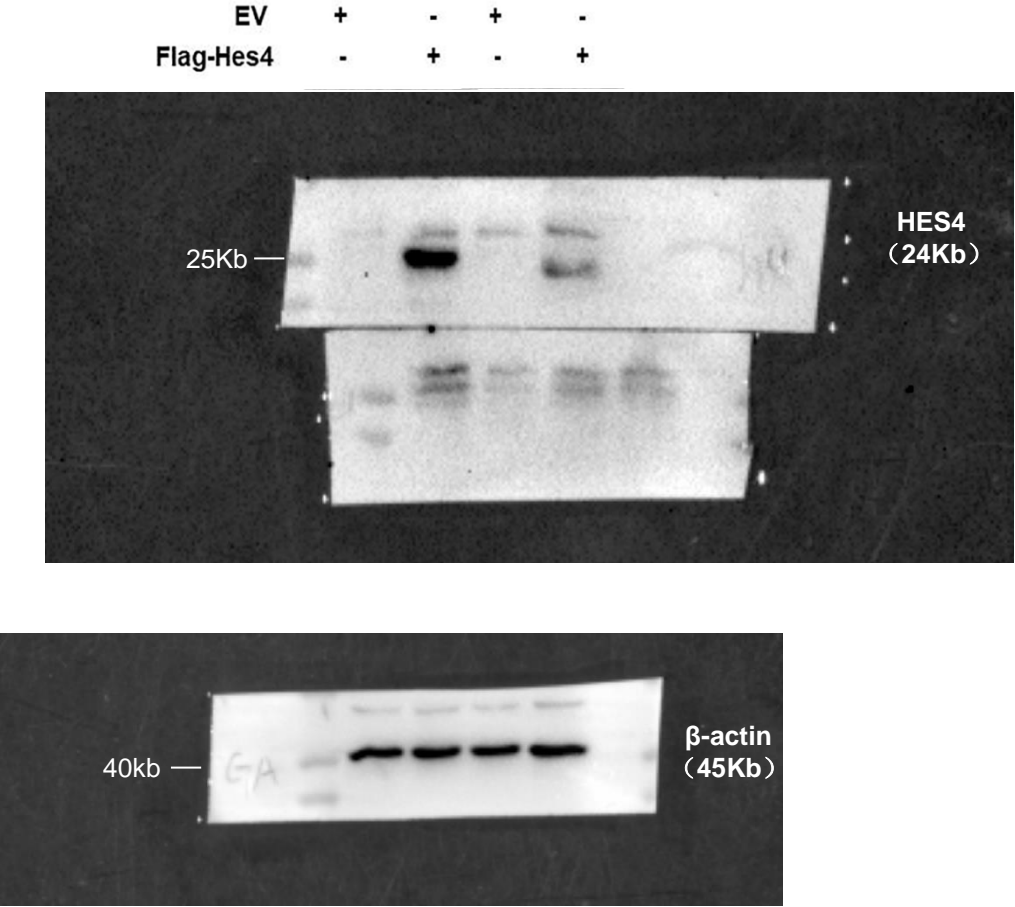

Supplement: fig3-figsupp1-data2 [file elife-88879-fig3-figsupp1-data2-v1.zip]

Fig 4D

|            | Input |   | IP  |     |     |     |
|------------|-------|---|-----|-----|-----|-----|
|            |       |   | IgG | Myc | IgG | Myc |
| Myc-TWIST1 | -     | + | -   | -   | +   | +   |
| BEST4-HA   | -     | + | -   | -   | +   | +   |

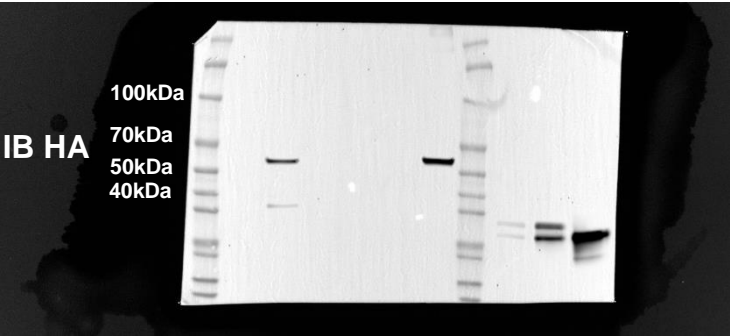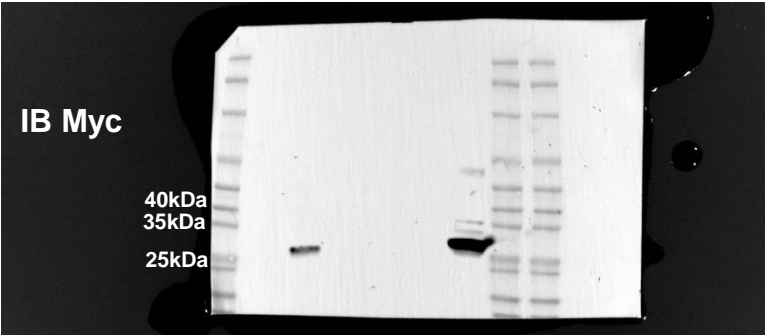

IB Lamin b1  
(66kDa)

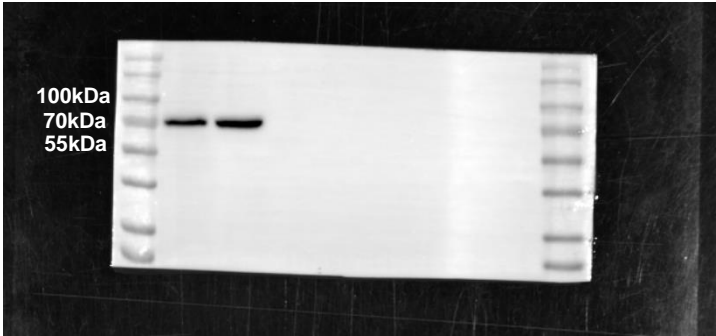

Supplement: fig4-data2 [file elife-88879-fig4-data2-v1.zip]

Fig 4H

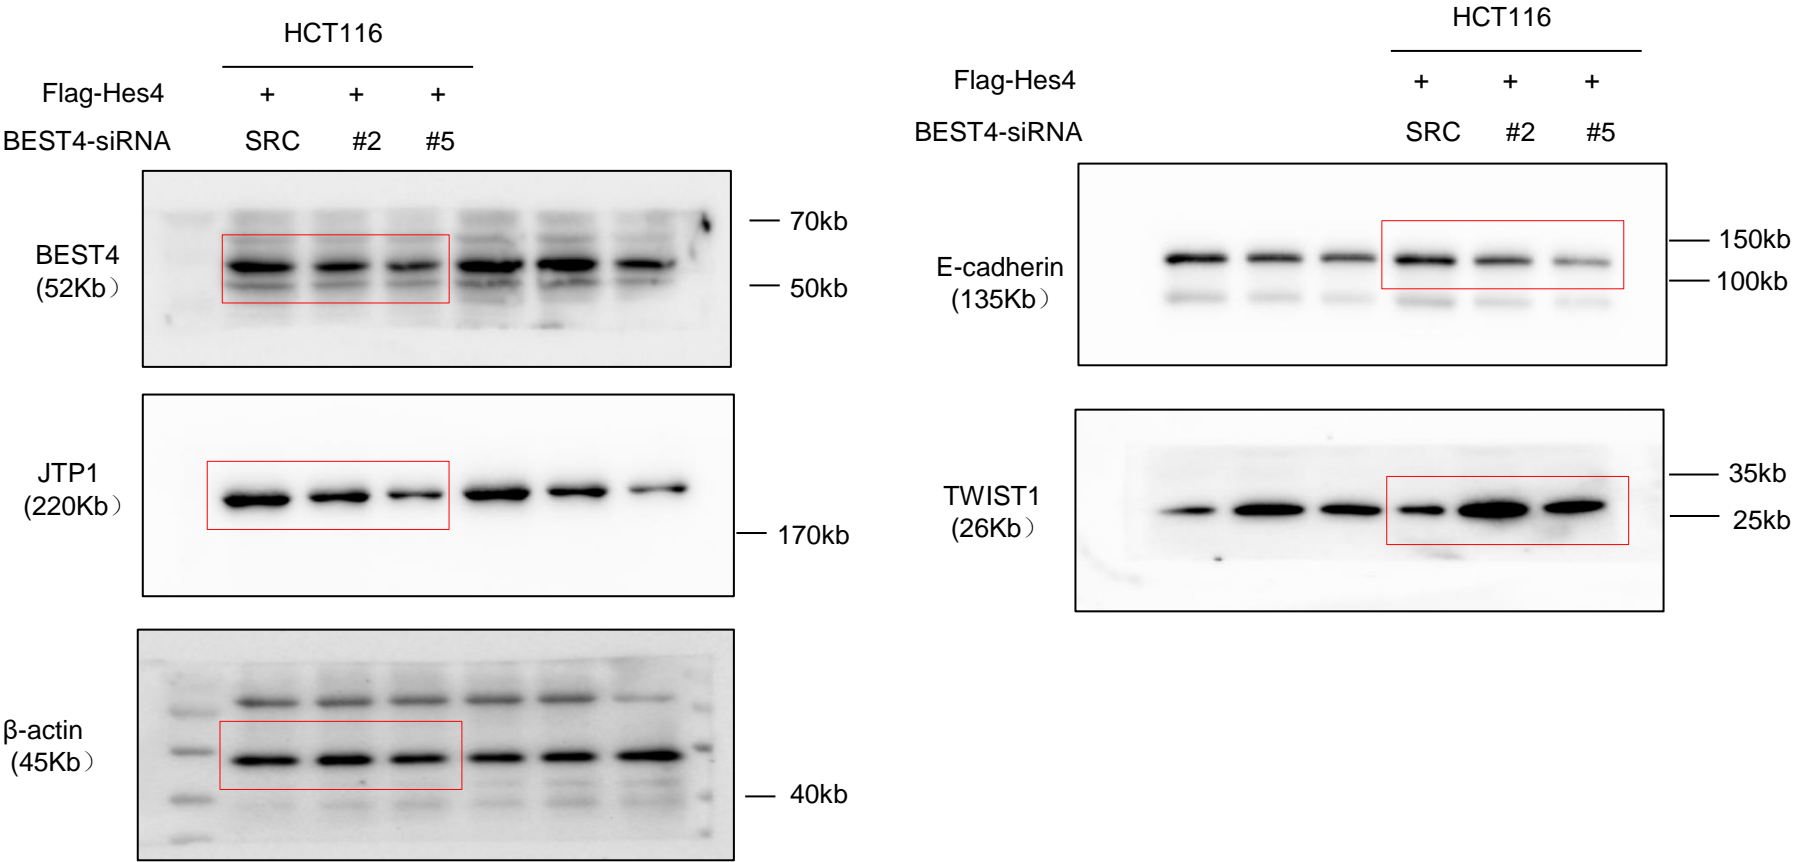

Supplement: fig4-data2 [file elife-88879-fig4-data2-v1.zip]

Fig 4G

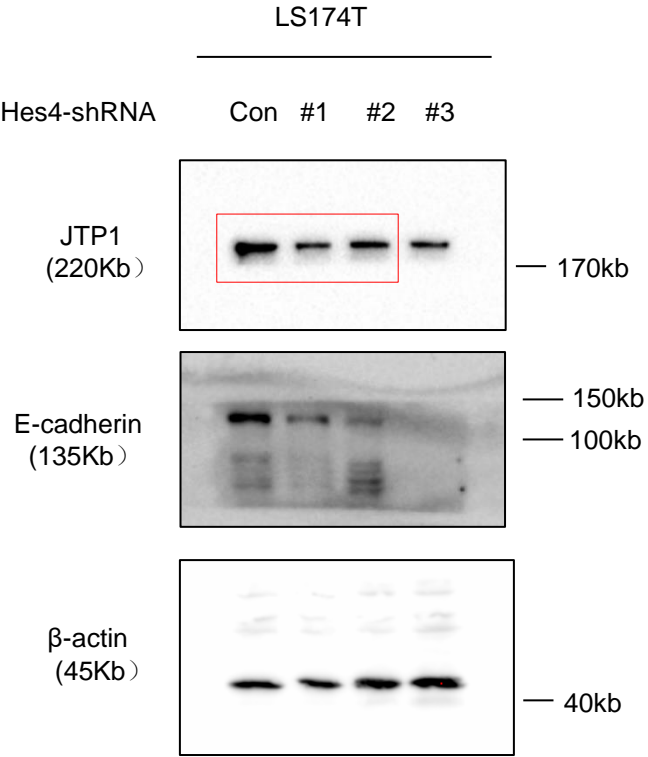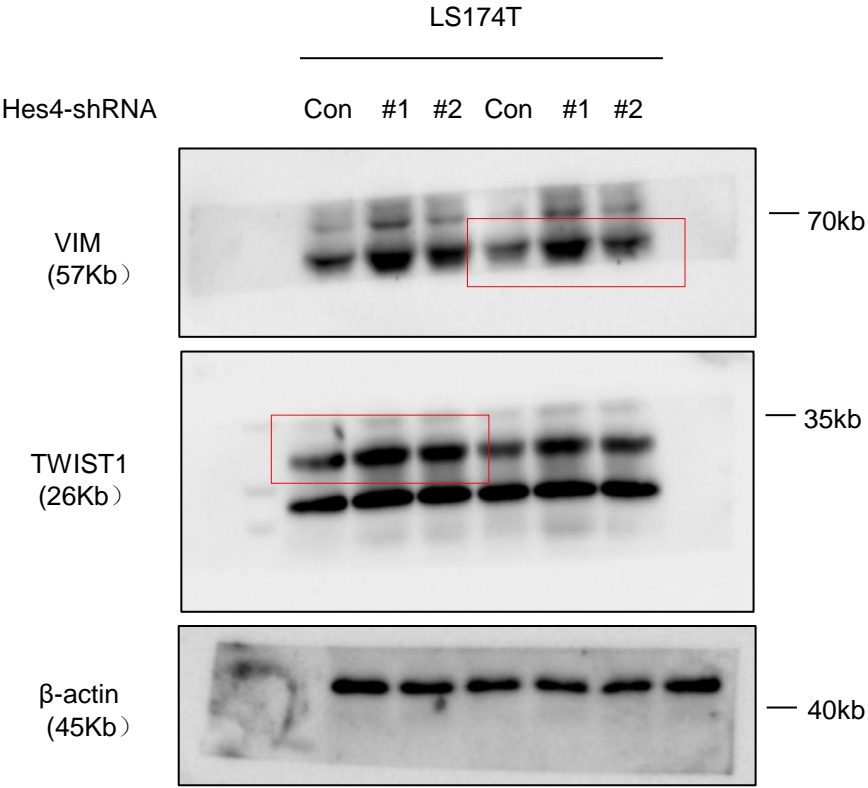

Supplement: fig4-data2 [file elife-88879-fig4-data2-v1.zip]

Fig 4E

|             | Input     |   |    |    | IP: Myc   |   |    |    | IP: IgG   |   |    |    |
|-------------|-----------|---|----|----|-----------|---|----|----|-----------|---|----|----|
|             | Flag-Hes4 |   |    |    | Flag-Hes4 |   |    |    | Flag-Hes4 |   |    |    |
| Myc-TWIST1  | -         | + | +  | +  | -         | + | +  | +  | -         | + | +  | +  |
| BEST4-siRNA | -         | - | #2 | #5 | -         | - | #2 | #5 | -         | - | #2 | #5 |

IB Flag

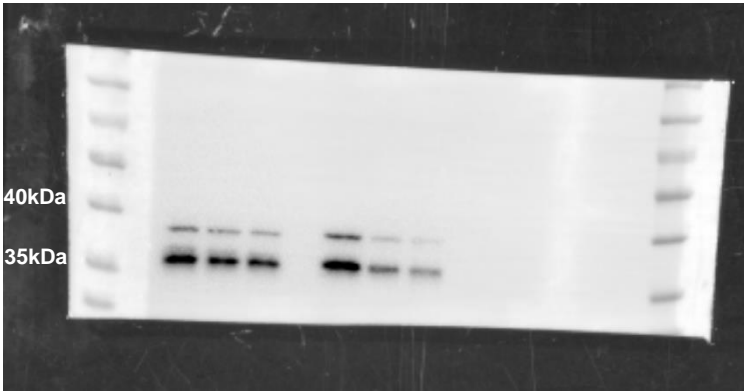

IB Myc

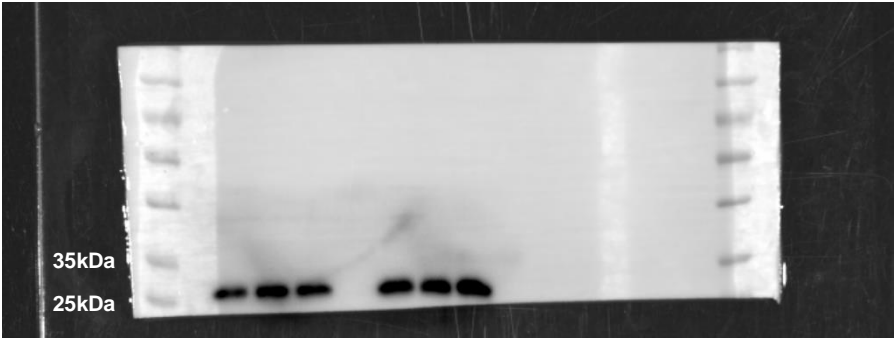

IB Lamin b1  
(66kDa)

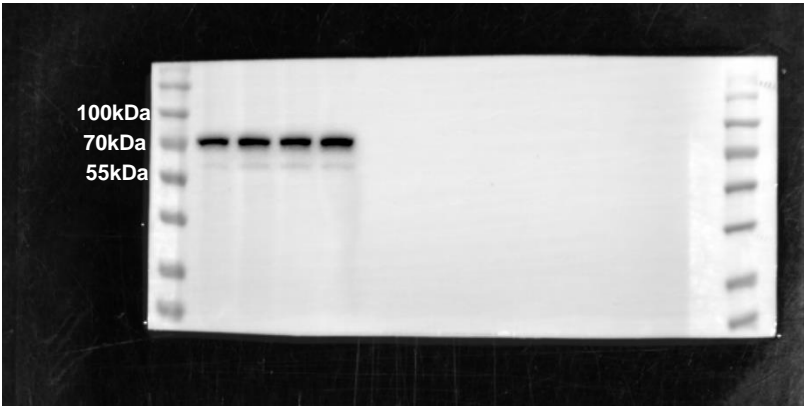

Supplement: fig4-data2 [file elife-88879-fig4-data2-v1.zip]

Fig 4I

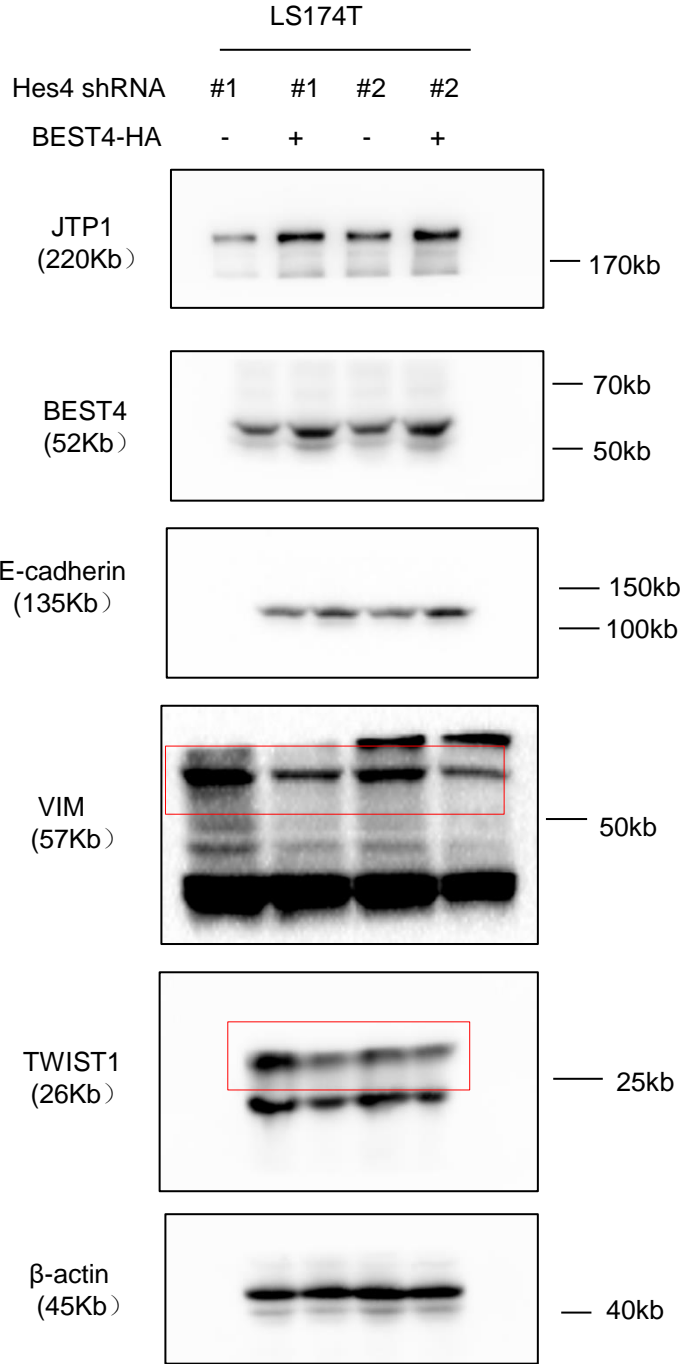

Supplement: fig4-data2 [file elife-88879-fig4-data2-v1.zip]

**Fig 4F**

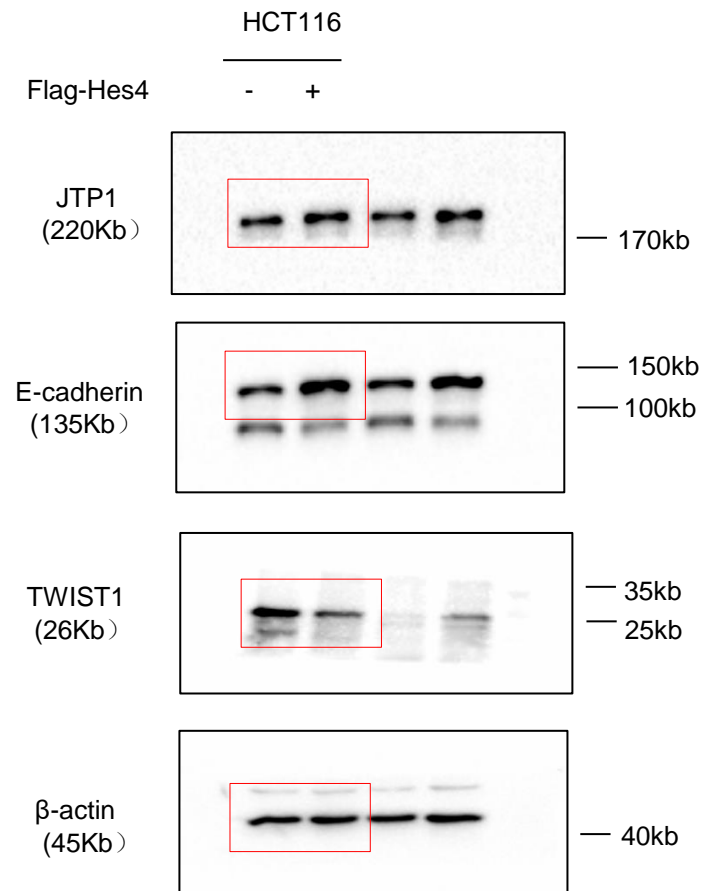

Supplement: fig4-data2 [file elife-88879-fig4-data2-v1.zip]

Figure 4-supplemental figure 1C

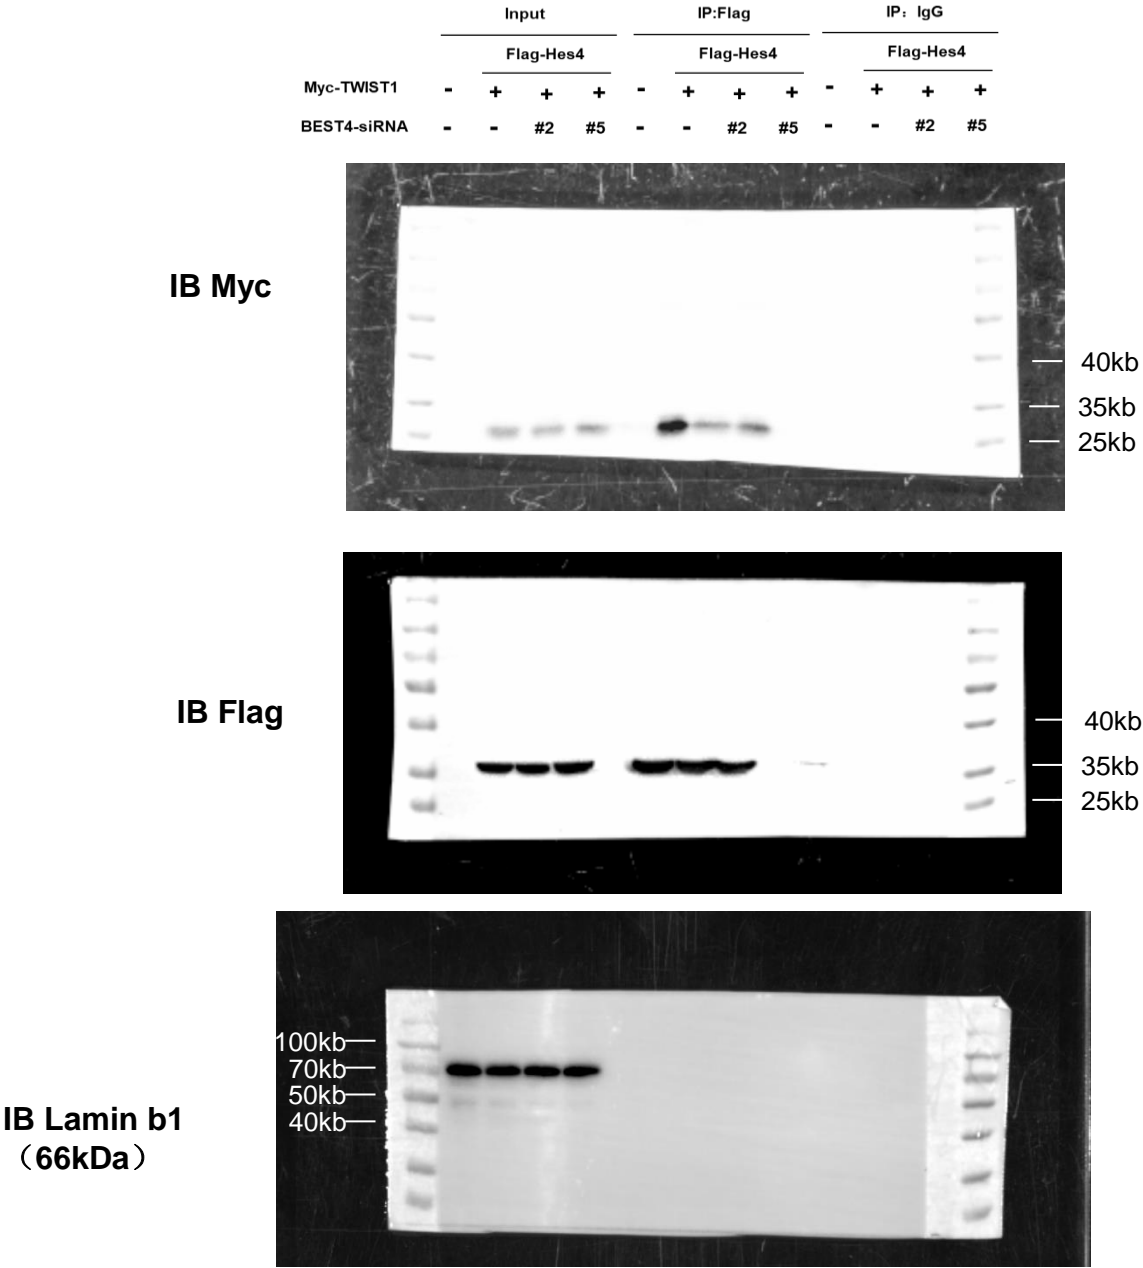

Supplement: fig4-figsupp1-data2 [file elife-88879-fig4-figsupp1-data2-v1.zip]

Fig 5E

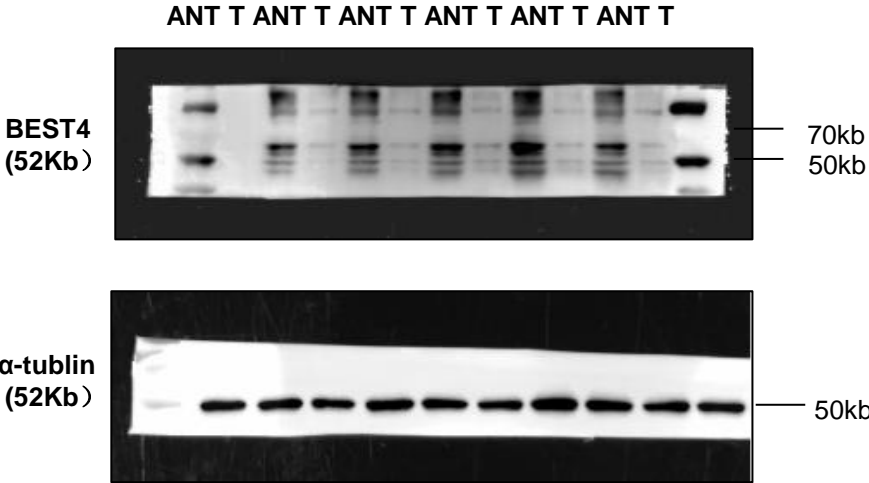

Supplement: fig5-data2 [file elife-88879-fig5-data2-v1.zip]

Figure 5-supplemental figure 1D

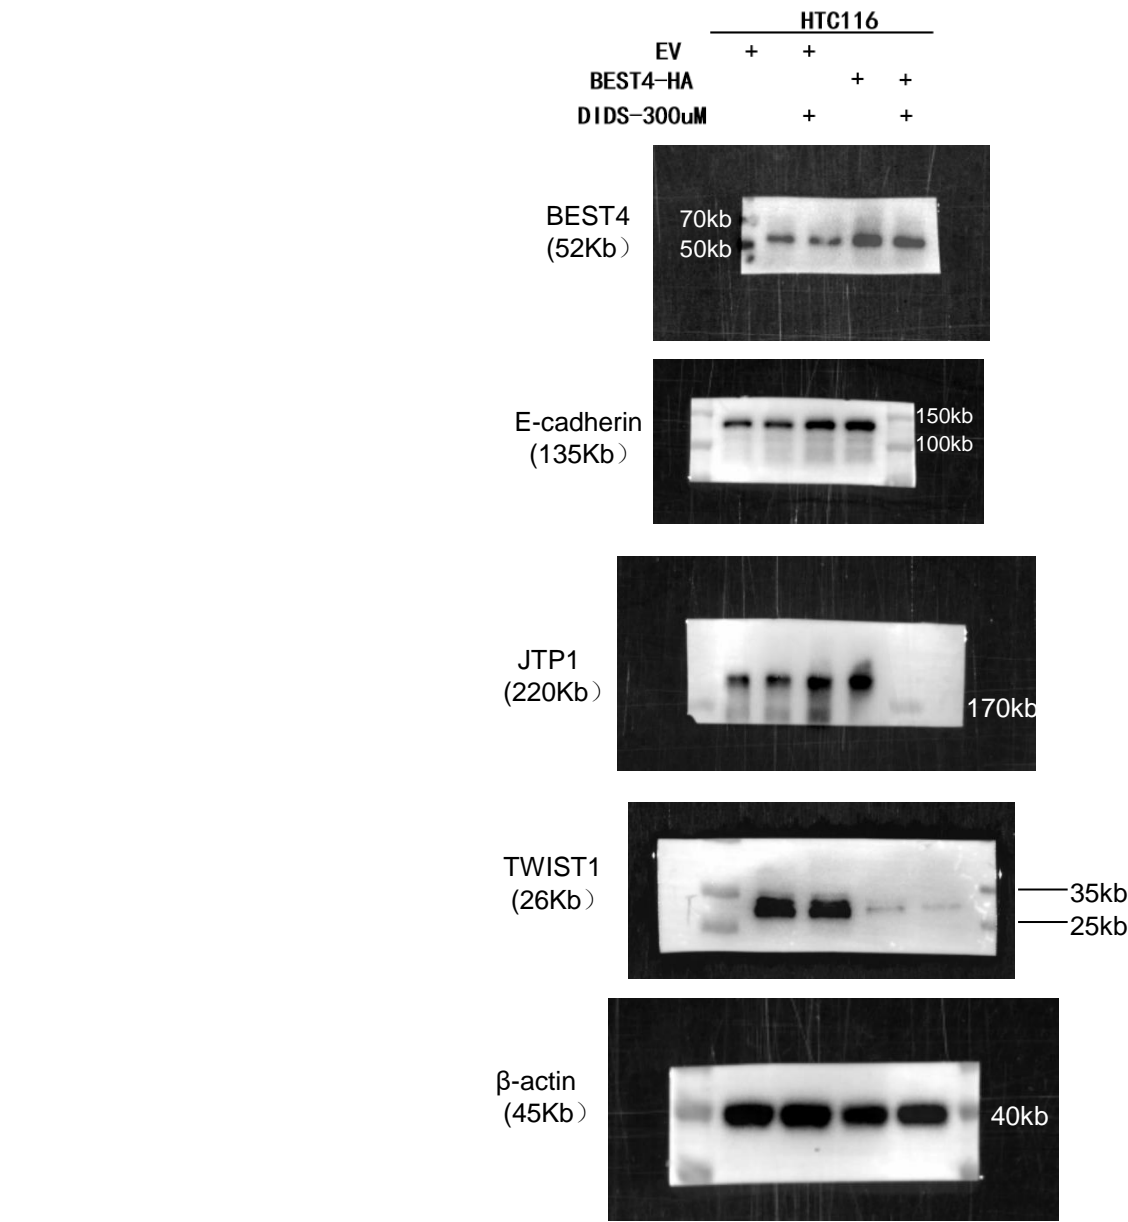

Supplement: fig5-figsupp1-data2 [file elife-88879-fig5-figsupp1-data2-v1.zip]

Figure 5-supplemental figure 1E

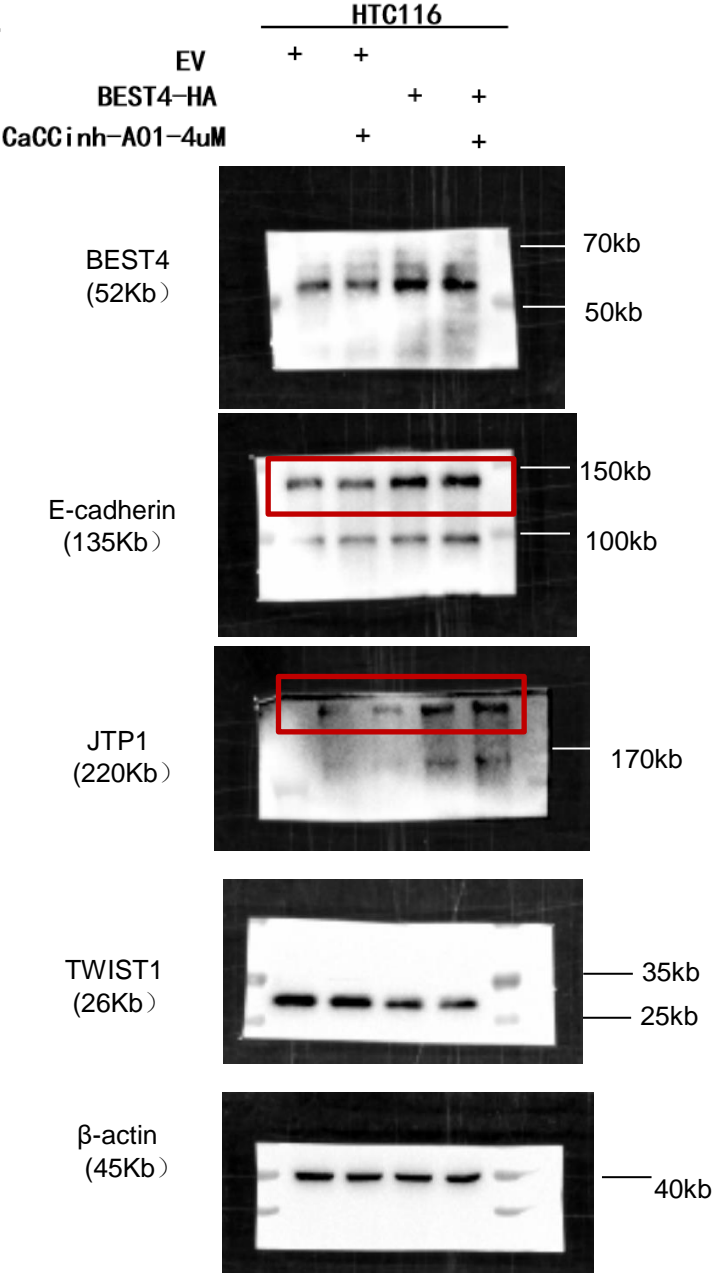

Supplement: fig5-figsupp1-data2 [file elife-88879-fig5-figsupp1-data2-v1.zip]

Figure 5-supplemental figure 1F

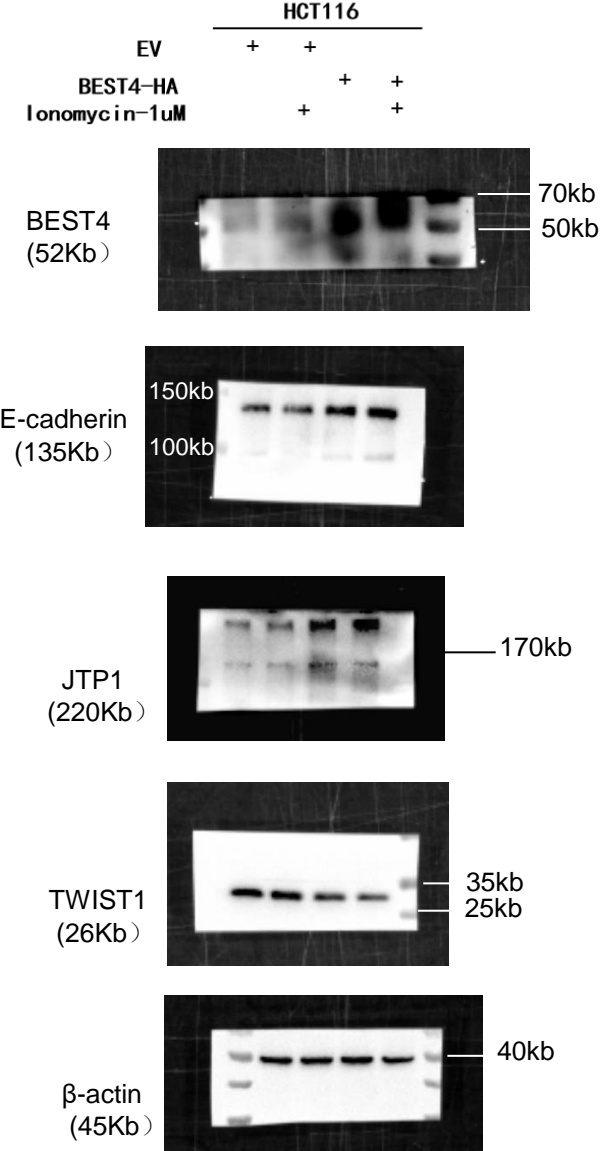

Supplement: fig5-figsupp1-data2 [file elife-88879-fig5-figsupp1-data2-v1.zip]
